# Supplementary material for: The effect of interventions targeting screen time reduction: A systematic review and meta-analysis
Source: PubMed Central journal article supplement (PMC5058814; doi:10.1097/md.0000000000004029), 2016-07-08
Supplement: medi-95-e4029-s001.pdf [file medi-95-e4029-s001.pdf]

## **APPENDIX 1.** Search strategy

### **Source: PubMed**

Searched on: August 27th, 2015

#1 TV [Title/Abstract]

#2 television [Title/Abstract]

#3 "screen time" [Title/Abstract]

#4 video\* [Title/Abstract]

#5 computer\* [Title/Abstract]

#6 "obesity"[Mesh]

#7 "overweight"[Mesh]

#8 "body mass index"[Mesh]

#9 obes\*

#10 overweight\*

#11 adiposi\*

#12 bmi

#13 random\*

#14 "randomized controlled trial"[publication type] OR "randomized controlled trials as topic" [Mesh]

#15 #1 OR #2 OR #3 OR #4 OR #5

#16 #6 OR #7 OR #8 OR #9 OR #10 OR #11 OR #12

#17 #13 OR #14

#18 #15 AND #16 AND #17

### **Source: Embase**

Searched on: August 27th, 2015

#1 TV:ti,ab  
#2 television:ti,ab  
#3 'screen time':ti,ab  
#4 video\*:ti,ab  
#5 computer\*:ti,ab  
#6 obesity:ti,ab  
#7 obese:ti,ab  
#8 'body mass index':ti,ab  
#9 bmi:ti,ab  
#10 overweight:ti,ab  
#11 adiposis:ti,ab  
#12 adiposity:ti,ab  
#13 random\*:ti,ab  
#14 'randomized controlled trials':ti,ab  
#15 'randomized controlled trials'/exp OR 'randomized controlled trials (topic)'/exp  
#16 #1 OR #2 OR #3 OR #4 OR #5  
#17 #6 OR #7 OR #8 OR #9 OR #10 OR #11 OR #12  
#18 #13 OR #14 OR #15  
#19 #16 AND #17 AND #18

**Source: Cochrane Central Register of Controlled Trials**

Searched on: August 27th, 2015

(TV OR television OR "screen time" OR video OR computer) AND (obesity OR obese OR "body mass index" OR overweight OR adiposis)

|                      | Random sequence generation (selection bias) | Allocation concealment (selection bias) | Blinding of participants and personnel (performance bias) | Blinding of outcome assessment (detection bias) | Incomplete outcome data (attrition bias) | Selective reporting (reporting bias) | Other bias |
|----------------------|---------------------------------------------|-----------------------------------------|-----------------------------------------------------------|-------------------------------------------------|------------------------------------------|--------------------------------------|------------|
| Birken, 2012         | +                                           | +                                       | +                                                         | +                                               | +                                        | +                                    | +          |
| Dennison, 2004       | +                                           | +                                       | ?                                                         | +                                               | -                                        | +                                    | +          |
| Epstein, 2008        | +                                           | +                                       | ?                                                         | ?                                               | +                                        | +                                    | +          |
| Escobar-Chaves, 2010 | ?                                           | ?                                       | ?                                                         | ?                                               | +                                        | +                                    | +          |
| Ford, 2002           | +                                           | +                                       | ?                                                         | ?                                               | +                                        | +                                    | +          |
| Maddison, 2014       | +                                           | +                                       | +                                                         | +                                               | +                                        | +                                    | +          |
| Ni Mhurchu, 2009     | +                                           | ?                                       | ?                                                         | ?                                               | +                                        | +                                    | +          |
| Otten, 2009          | +                                           | +                                       | +                                                         | +                                               | +                                        | +                                    | +          |
| Raynor, 2013         | +                                           | +                                       | +                                                         | +                                               | +                                        | +                                    | +          |
| Robinson, 1999       | ?                                           | ?                                       | ?                                                         | +                                               | +                                        | +                                    | +          |
| Robinson, 2010       | +                                           | ?                                       | ?                                                         | ?                                               | +                                        | +                                    | +          |
| Taveras, 2011        | +                                           | +                                       | ?                                                         | ?                                               | +                                        | +                                    | +          |
| Todd, 2008           | +                                           | +                                       | +                                                         | ?                                               | +                                        | +                                    | +          |
| Yilmaz, 2014         | +                                           | +                                       | +                                                         | +                                               | +                                        | +                                    | +          |

**APPENDIX 2.** Assessment of risk of bias of included trials
